# Supplementary material
Source: PubMed Central journal article supplement (PMC4815500)
Supplement: hdy201516x1.pdf [file hdy201516x1.pdf]

## Supplementary Information

Supplementary Table S1: Number of stress levels in I-E studies.

| Study                                      | Number of stress levels<br>(more than the control) | Significant<br>interaction           | Number of<br>stressors |
|--------------------------------------------|----------------------------------------------------|--------------------------------------|------------------------|
| (Bijlsma <i>et al.</i> ,<br>1999)          | 1                                                  | Dependent on<br>stressor             | 4                      |
| (Keller <i>et al.</i> , 2002)              | 1                                                  | Dependent on trait<br>of measure     | 1                      |
| (Armbruster <i>et al.</i> ,<br>2000)       | 1                                                  | No                                   | 2                      |
| (Bijlsma <i>et al.</i> ,<br>2000)          | 1                                                  | Yes                                  | 2                      |
| (Carr <i>et al.</i> , 2003)                | 1                                                  | No                                   | 1                      |
| (Carr and Eubanks,<br>2002)                | 1                                                  | Yes                                  | 1                      |
| (Chen, 1993)                               | 1                                                  | Yes                                  | 1                      |
| (Cheptou, Berger,<br><i>et al.</i> , 2000) | 2 (continuous)                                     | Dependent on trait<br>of measure     | 1                      |
| (Cheptou, Imbert,<br><i>et al.</i> , 2000) | 1                                                  | Dependent on trait<br>of measure     | 1                      |
| (Cheptou <i>et al.</i> ,<br>2001)          | 1                                                  | Dependent on trait<br>of measure     | 2                      |
| (Dahlgaard and<br>Hoffmann, 2000)          | 1                                                  | Yes                                  | 1                      |
| (Dahlgaard <i>et al.</i> ,<br>1995)        | 1-2 (continuous)                                   | Dependent on trait<br>of measure     | 2                      |
| (Dahlgaard and<br>Loeschcke, 1997)         | 1                                                  | No                                   | 1                      |
| (Dudash, 1990)                             | 2 (non-continuous)                                 | Yes                                  | 1                      |
| (Eckert and Barrett,<br>1994)              | 2 (continuous)                                     | Yes                                  | 1                      |
| (Fowler and<br>Whitlock, 2002)             | 1                                                  | No                                   | 2                      |
| (Haag <i>et al.</i> , 2002)                | 1                                                  | Yes                                  | 2                      |
| (Haag <i>et al.</i> , 2003)                | 1                                                  | No                                   | 2                      |
| (Hauser and<br>Loeschcke, 1996)            | 2 (continuous)                                     | Dependent on trait<br>of measure     | 1                      |
| (Henry <i>et al.</i> , 2003)               | 1                                                  | No                                   | 1                      |
| (Ivey <i>et al.</i> , 2004)                | 1                                                  | Dependent on the<br>trait of measure | 1                      |
| (Jiménez <i>et al.</i> ,<br>1994)          | 1                                                  | Yes                                  | 1                      |
| (Johnston, 1992)                           | 1                                                  | Dependent on the<br>trait of measure | 1                      |
| (Joron and<br>Brakefield, 2003)            | 1                                                  | Yes                                  | 1                      |
| (Koelewijn, 1998)                          | 1                                                  | Yes                                  | 1                      |
| (Kristensen <i>et al.</i> ,                | 2 (non-continuous)                                 | Dependent on the                     | 2                      |

|                                   |                                           |                                   |    |
|-----------------------------------|-------------------------------------------|-----------------------------------|----|
| 2003)                             |                                           | trait of measure                  |    |
| (Miller, 1994)                    | 2 (non-continuous)                        | Dependent on the trait of measure | 2  |
| (Norman <i>et al.</i> , 1995)     | 1                                         | Dependent on the trait of measure | 1  |
| (Pray <i>et al.</i> , 1994)       | 1                                         | Yes                               | 1  |
| (Reed and Bryant, 2001)           | 1                                         | Yes                               | 2  |
| (Reed <i>et al.</i> , 2002)       | 3 (non-continuous)                        | Yes                               | 3  |
| (Schemske, 1983)                  | 1                                         | No                                | 1  |
| (Schmitt and Ehrhardt, 1990)      | 1                                         | Yes                               | 2  |
| (Waller, 1984)                    | 2 (continuous)                            | No                                | 1  |
| (Wolfe, 1993)                     | 1                                         | Yes                               | 1  |
| (Fox and Reed, 2011)              | 2 (continuous)                            | Dependent on the trait of measure | 1  |
| (Fox <i>et al.</i> , 2010)        | 3 (continuous)                            | Yes                               | 1  |
| (Hayes <i>et al.</i> , 2005)      | 1                                         | Yes                               | 1  |
| (Kristensen <i>et al.</i> , 2008) | 2 (continuous)                            | Yes                               | 2  |
| (Markert <i>et al.</i> , 2010)    | 1                                         | Yes                               | 1  |
| (Marr <i>et al.</i> , 2006)       | Uncontrolled continuous natural variable  | Dependent on the trait of measure | 2  |
| (Nowak <i>et al.</i> , 2007)      | 4 (continuous)                            | Dependent on the trait of measure | 1  |
| (Reed <i>et al.</i> , 2007)       | Uncontrolled continuous natural variable  | Yes                               | 1  |
| (Rowe and Beebee, 2005)           | 1                                         | Yes                               | 1  |
| (Szulkin and Sheldon, 2007)       | Uncontrolled continuous natural variables | 1 out of 11                       | 11 |
| (Mikkelsen <i>et al.</i> , 2010)  | 1                                         | Yes                               | 1  |
| (Kristensen <i>et al.</i> , 2011) | 1                                         | No                                | 1  |
| (Enders and Nunney, 2012)         | Uncontrolled continuous natural variable  | Yes                               | 1  |
| (Franke and Fischer, 2013)        | 2                                         | No                                | 1  |

## References

- Armbruster P, Hutchinson RA, Linvell T (2000). Equivalent inbreeding depression under laboratory and field conditions in a tree-hole-breeding mosquito. *Proc R Soc Lond B Biol Sci* **267**: 1939–45.
- Bijlsma R, Bundgaard J, Boerema AC (2000). Does inbreeding affect the extinction risk of small populations?: predictions from *Drosophila*. *J Evol Biol* **13**: 502–514.
- Bijlsma R, Bundgaard J, Putten WFVAN (1999). Environmental dependence of inbreeding depression and purging in *Drosophila melanogaster*. *J Evol Biol* **12**: 1125–1137.
- Carr DE, Eubanks MD (2002). Inbreeding alters resistance to insect herbivory and host plant quality in *Mimulus guttatus* (Scrophulariaceae). *Evolution* **56**: 22–30.
- Carr DE, Murphy JF, Eubanks MD (2003). The susceptibility and response of inbred and outbred *Mimulus guttatus* to infection by Cucumber mosaic virus. *Evol Ecol* **17**: 85–103.
- Chen X (1993). Comparison of inbreeding and outbreeding in hermaphroditic *Arianta arbustorum* (L.) (land snail). *Heredity* **71**: 456–461.
- Cheptou P-O, Berger A, Blanchard A, Collin C, Escarre J (2000). The effect of drought stress on inbreeding depression in four populations of the Mediterranean outcrossing plant *Crepis sancta* (Asteraceae). *Heredity* **85**: 294–302.
- Cheptou P-O, Imbert E, Lepart J, Escarre J (2000). Effects of competition on lifetime estimates of inbreeding depression in the outcrossing plant *Crepis sancta* (Asteraceae). *J Evol Biol* **13**: 522–531.
- Cheptou P-O, Lepart J, Escarré J (2001). Inbreeding depression under intraspecific competition in a high outcrossing population of *Crepis sancta* (Asteraceae): evidence for frequency-dependent variation. *Am J Bot* **88**: 1424–1429.
- Dahlgaard J, Hoffmann AA (2000). Stress resistance and environmental dependency of inbreeding depression in *Drosophila melanogaster*. *Conserv Biol* **14**: 1187–1192.
- Dahlgaard J, Krebs R, Loeschke V (1995). Heat-shock tolerance and inbreeding in *Drosophila buzzatii*. *Heredity* **74**: 157–163.
- Dahlgaard J, Loeschke V (1997). Effects of inbreeding in three life stages of *Drosophila buzzatii* after embryos were exposed to a high temperature stress. *Heredity* **78**: 410–416.

- Dudash MR (1990). Relative fitness of selfed and outcrossed progeny in a self-compatible, protandrous species, *Sabatia angularis* L. (Gentianaceae). *Evolution* **44**: 1129–1139.
- Eckert CG, Barrett SCH (1994). Inbreeding depression in partially self-fertilizing *Decodon verticillatus* (Lythraceae): population-genetic and experimental analyses. *Evolution* **48**: 952–964.
- Enders LS, Nunney L (2012). Seasonal stress drives predictable changes in inbreeding depression in field-tested captive populations of *Drosophila melanogaster*. *Proc R Soc Lond B Biol Sci* **279**: 3756–3764.
- Fowler K, Whitlock MC (2002). Environmental stress, inbreeding, and the nature of phenotypic and genetic variance in *Drosophila melanogaster*. *Proc R Soc Lond B Biol Sci* **269**: 677–683.
- Fox CW, Reed DH (2011). Inbreeding depression increases with environmental stress: an experimental study and meta-analysis. *Evolution* **65**: 246–258.
- Fox CW, Stillwell RC, Wallin WG, Curtis CL, Reed DH (2010). Inbreeding-environment interactions for fitness: complex relationships between inbreeding depression and temperature stress in a seed-feeding beetle. *Evol Ecol* **25**: 25–43.
- Franke K, Fischer K (2013). Effects of inbreeding and temperature stress on life history and immune function in a butterfly. *J Evol Biol* **26**: 517–528.
- Hauser T, Loeschke V (1996). Drought stress and inbreeding depression in *Lychnis flos-cuculi* (Caryophyllaceae). *Evolution* **50**: 1119–1126.
- Hayes CN, Winsor JA, Stephenson AG (2005). Environmental variation influences the magnitude of inbreeding depression in *Cucurbita pepo* ssp. *texana* (Cucurbitaceae). *J Evol Biol* **18**: 147–155.
- Henry P-Y, Pradel R, Jarne P (2003). Environment-dependent inbreeding depression in a hermaphroditic freshwater snail. *J Evol Biol* **16**: 1211–1222.
- Haag CR, Hottringer JW, Riex M, Ebert D (2002). Strong inbreeding depression in a daphnia metapopulation. *Evolution* **56**: 518–526.
- Haag CR, Sakwińska O, Ebert D (2003). Test of synergistic interaction between infection and inbreeding in *Daphnia magna*. *Evolution* **57**: 777–783.
- Ivey CT, Carr DE, Eubanks MD (2004). Effects of inbreeding in *Mimulus guttatus* on tolerance to herbivory in natural environments. *Ecology* **85**: 567–574.
- Jiménez JA, Hughes KA, Alaks G, Graham L, Lacy RC (1994). An experimental study of inbreeding depression in a natural habitat. *Science* **265**: 271–273.
- Johnston M (1992). Effects of cross and self-fertilization on progeny fitness in *Lobelia cardinalis* and *L. siphilitica*. *Evolution* **46**: 688–702.

- Joron M, Brakefield PM (2003). Captivity masks inbreeding effects on male mating success in butterflies. *Nature* **424**: 191–194.
- Keller LF, Grant PR, Grant BR, Petren K (2002). Environmental conditions affect the magnitude of inbreeding depression in survival of Darwin's finches. *Evolution* **56**: 1229–1239.
- Koelewijn HP (1998). Effects of different levels of inbreeding on progeny fitness in *Plantago coronopus*. *Evolution* **52**: 692–702.
- Kristensen TN, Barker JSF, Pedersen KS, Loeschcke V (2008). Extreme temperatures increase the deleterious consequences of inbreeding under laboratory and semi-natural conditions. *Proc R Soc Lond B Biol Sci* **275**: 2055–2061.
- Kristensen TN, Dahlgaard J, Loeschcke V (2003). Effects of inbreeding and environmental stress on fitness – using *Drosophila buzzatii* as a model organism. *Conserv Genet* **4**: 453–465.
- Kristensen TN, Knudsen MR, Loeschcke V (2011). Slow inbred lines of *Drosophila melanogaster* express as much inbreeding depression as fast inbred lines under semi-natural conditions. *Genetica* **139**: 441–451.
- Markert JA, Champlin DM, Gutjahr-Gobell R, Grear JS, Kuhn A, McGreevy TJ, *et al.* (2010). Population genetic diversity and fitness in multiple environments. *BMC Evol Biol* **10**: 205.
- Marr AB, Arcese P, Hochachka WM, Reid JM, Keller LF (2006). Interactive effects of environmental stress and inbreeding on reproductive traits in a wild bird population. *J Anim Ecol* **75**: 1406–1415.
- Mikkelsen K, Loeschcke V, Kristensen TN (2010). Trait specific consequences of fast and slow inbreeding: lessons from captive populations of *Drosophila melanogaster*. *Conserv Genet* **11**: 479–488.
- Miller PS (1994). Is inbreeding depression more severe in a stressful environment? *Zoobiology* **13**: 195–208.
- Norman JK, Sakai AK, Weller SG, Dawson TE (1995). Inbreeding depression in morphological and physiological traits of *Schiedea lydgatei* (Caryophyllaceae) in two environments. *Evolution* **49**: 297–306.
- Nowak C, Jost D, Vogt C, Oetken M, Schwenk K, Oehlmann J (2007). Consequences of inbreeding and reduced genetic variation on tolerance to cadmium stress in the midge *Chironomus riparius*. *Aquat Toxicol* **85**: 278–284.
- Pray LA, Schwartz JM, Goodnight CJ, Stevens L (1994). Environmental dependency of inbreeding depression: implications for conservation biology. *Conserv Biol* **8**: 562–568.

- Reed DH, Briscoe DA, Frankham R (2002). Inbreeding and extinction: The effect of environmental stress and lineage. *Conserv Genet* **3**: 301–307.
- Reed DH, Bryant EH (2001). Fitness, genetic load and purging in experimental populations of the housefly. *Conserv Genet* **2**: 57–62.
- Reed DH, Nicholas AC, Stratton GE (2007). Inbreeding levels and prey abundance interact to determine fecundity in natural populations of two species of wolf spider. *Conserv Genet* **8**: 1061–1071.
- Rowe G, Beebee TJC (2005). Intraspecific competition disadvantages inbred natterjack toad (*Bufo calamita*) genotypes over outbred ones in a shared pond environment. *J Anim Ecol* **74**: 71–76.
- Schemske D (1983). Breeding system and habitat effects on fitness components in three neotropical *Costus* (Zingiberaceae). *Evolution* **37**: 523–539.
- Schmitt J, Ehrhardt DW (1990). Enhancement of inbreeding depression by dominance and suppression in *Impatiens capensis*. *Evolution* **44**: 269–278.
- Szulkin M, Sheldon BC (2007). The environmental dependence of inbreeding depression in a wild bird population. *PLOS ONE* **2**: e1027.
- Waller D (1984). Differences in fitness between seedlings derived from cleistogamous and chasmogamous flowers in *Impatiens capensis*. *Evolution* **38**: 427–440.
- Wolfe LM (1993). Inbreeding depression in *Hydrophyllum appendiculatum*: role of maternal effects, crowding, and parental mating history. *Evolution* **47**: 374–386.

Supplementary Text S1: Cooking program in mediaclave.

Ingredients were mixed such that the volume reached 2.5 L. The medium was then heated up to 121 °C (1.2 bar) at which it was maintained for 15 min. Hereafter the mixture was cooled down to 70 °C before the medium was dispensed into the vials. The vials were directly transferred to 4 °C where they were kept until usage.

Supplementary Table S2: Population specific sample size for dry body mass assessments.

Number of flies for which dry body mass was assessed in each replicate population within breeding regime across all media. A group containing less than five was not assessed, and is therefore denoted “0”.

| Breeding regime      | N10 |    |    |    |    | N50 |    |    |    |    | N500 |    |    |    |    |    |    |    |    |
|----------------------|-----|----|----|----|----|-----|----|----|----|----|------|----|----|----|----|----|----|----|----|
|                      | A   | B  | C  | D  | E  | F   | G  | H  | I  | J  | A    | B  | C  | D  | E  | F  | A  | B  | C  |
| Replicate population | 0   | 0  | 0  | 0  | 0  | 0   | 0  | 0  | 0  | 0  | 0    | 0  | 0  | 0  | 0  | 0  | 0  | 0  | 0  |
| Medium 10            | 0   | 0  | 0  | 0  | 0  | 0   | 0  | 0  | 0  | 0  | 0    | 0  | 0  | 0  | 0  | 0  | 0  | 0  | 0  |
| Medium 9             | 0   | 16 | 10 | 5  | 0  | 16  | 14 | 11 | 0  | 9  | 10   | 16 | 16 | 6  | 16 | 16 | 16 | 16 | 16 |
| Medium 8             | 0   | 16 | 16 | 16 | 0  | 16  | 16 | 16 | 10 | 16 | 16   | 16 | 16 | 8  | 16 | 16 | 16 | 15 | 16 |
| Medium 7             | 0   | 16 | 16 | 16 | 0  | 16  | 16 | 16 | 15 | 16 | 16   | 16 | 16 | 8  | 16 | 15 | 16 | 16 | 16 |
| Medium 6             | 0   | 16 | 15 | 16 | 13 | 16  | 16 | 16 | 16 | 16 | 16   | 16 | 15 | 16 | 16 | 16 | 16 | 16 | 16 |
| Medium 5             | 12  | 16 | 16 | 15 | 16 | 16  | 16 | 16 | 16 | 16 | 16   | 16 | 16 | 16 | 16 | 16 | 16 | 16 | 16 |
| Medium 4             | 16  | 16 | 16 | 16 | 16 | 16  | 16 | 16 | 16 | 16 | 16   | 16 | 16 | 16 | 16 | 16 | 16 | 16 | 16 |
| Medium 3             | 16  | 16 | 16 | 16 | 16 | 16  | 16 | 16 | 16 | 16 | 16   | 16 | 16 | 16 | 16 | 16 | 16 | 16 | 16 |
| Medium 2             | 16  | 16 | 16 | 16 | 16 | 16  | 16 | 16 | 16 | 16 | 16   | 16 | 16 | 16 | 15 | 16 | 16 | 16 | 16 |
| Medium 1             | 16  | 16 | 16 | 16 | 15 | 16  | 16 | 16 | 16 | 16 | 16   | 16 | 16 | 16 | 16 | 16 | 16 | 16 | 16 |
| Control              | 16  | 16 | 16 | 16 | 16 | 16  | 16 | 16 | 16 | 15 | 16   | 15 | 16 | 16 | 16 | 16 | 16 | 16 | 16 |
